# Supplementary material for: Association between homologous recombination repair gene mutations and response to oxaliplatin in pancreatic cancer
Source: PubMed Central journal article supplement (PMC5929428; doi:10.18632/oncotarget.24865), 2018-04-13
Supplement: oncotarget-09-19817-s001.pdf [file oncotarget-09-19817-s001.pdf]

## Association between homologous recombination repair gene mutations and response to oxaliplatin in pancreatic cancer

### SUPPLEMENTARY MATERIALS

**Supplementary Table 1: Genes sequenced in OncoPrime™**

|                                                   |         |         |        |        |         |         |         |
|---------------------------------------------------|---------|---------|--------|--------|---------|---------|---------|
| ABL                                               | CARD11  | DNMT3A  | GATA2  | MAP2K2 | NOTCH3  | PTEN    | STAT3   |
| ABL2                                              | CASP8   | DPYD    | GATA3  | MAP2K4 | NOTCH4  | PTPN11  | STK11   |
| ACVR1B                                            | CBL     | EGFR    | GLI1   | MAP3K1 | NPM1    | RAD50   | SUFU    |
| AKT1                                              | CCND1   | EP300   | GNA11  | MAPK1  | NRAS    | RAD51   | TERT    |
| AKT2                                              | CCND2   | ERBB2   | GNAQ   | MDM2   | NTRK1   | RAF1    | TET2    |
| AKT3                                              | CCND3   | ERBB3   | GNAS   | MDM4   | NTRK2   | RB1     | TGFBR2  |
| ALK                                               | CCNE1   | ERBB4   | GRIN2A | MED12  | NTRK3   | RET     | TNFAIP3 |
| APC                                               | CDC73   | ERCC1   | H3F3A  | MEN1   | PALB2   | RICTOR  | TOP1    |
| AR                                                | CDH1    | ERCC2   | HNF1A  | MET    | PARP1   | RNF43   | TOP2A   |
| ARAF                                              | CDK4    | ERCC3   | HRAS   | MITF   | PAX5    | ROS1    | TP53    |
| ARID1A                                            | CDK6    | ERG     | IDH1   | MLH1   | PBRM1   | RPTOR   | TP63    |
| ARID1B                                            | CDKN2A  | ERRFI1  | IDH2   | MLL    | PDGFRA  | RSPO2   | TP73    |
| ASXL1                                             | CDKN2B  | ESR1    | IGF1R  | MPL    | PDGFRB  | RSPO3   | TPMT    |
| ATM                                               | CEBPA   | EZH2    | IGF2R  | MRE11A | PDK1    | RUNX1   | TRAF7   |
| ATR                                               | CHEK1   | FAM123B | IKZF1  | MSH2   | PGR     | SETD2   | TSC1    |
| ATRX                                              | CHEK2   | FANCA   | IL7R   | MSH6   | PHF6    | SF3B1   | TSC2    |
| AURKA                                             | CREBBP  | FBXW7   | INSR   | MTHFR  | PIK3CA  | SMAD2   | TSHR    |
| AURKB                                             | CRLF2   | FGFR1   | JAK1   | MTOR   | PIK3CG  | SMAD3   | TYMS    |
| AXIN1                                             | CSF1R   | FGFR2   | JAK2   | MYC    | PIK3R1  | SMAD4   | U2AF1   |
| BAP1                                              | CTNNA1  | FGFR3   | JAK3   | MYCN   | PIK3R2  | SMARCA4 | UGT1A1  |
| BCL2                                              | CTNNB1  | FGFR4   | KDM6A  | MYD88  | PIK3R5  | SMARCB1 | VHL     |
| BCOR                                              | CYP1A2  | FLT1    | KDR    | NBN    | PMS1    | SMO     | VKORC1  |
| BLM                                               | CYP2C19 | FLT3    | KIT    | NF1    | PMS2    | SOCS1   | WRN     |
| BRAF                                              | CYP2C9  | FLT4    | KLF4   | NF2    | PPP2R1A | SRC     | WT1     |
| BRCA1                                             | CYP2D6  | FOXL2   | KRAS   | NFE2L2 | PRDM1   | SRSF2   | XPC     |
| BRCA2                                             | DAXX    | G6PD    | MAML1  | NOTCH1 | PTCH1   | STAG2   | XRCC1   |
| BTK                                               | DDR2    | GATA1   | MAP2K1 | NOTCH2 | PTCH2   | STAT1   |         |
| <b>Genes targeted for rearrangement detection</b> |         |         |        |        |         |         |         |
| ALK                                               | EGFR    | ETV4    | ETV6   | MLL    | PDGFRB  | RARA    | ROS1    |
| BCR                                               | ETV1    | ETV5    | EWSR1  | PDGFRA | RAF1    | RET     | TMPRSS2 |
| BRAF                                              |         |         |        |        |         |         |         |
